# Supplementary material for: Incongruence between dominant commensal donor microbes in recipient feces post fecal transplant and response to anti-PD-1 immunotherapy
Source: PubMed Central journal article supplement (PMC8454007; doi:10.1186/s12866-021-02312-0), 2021-09-20
Supplement: 12866_2021_2312_MOESM1_ESM.pdf [file 12866_2021_2312_MOESM1_ESM.pdf]

Fig. S1

| Species                      | Response status   | Donor-Recipient | Days  |       |       |       |
|------------------------------|-------------------|-----------------|-------|-------|-------|-------|
|                              |                   |                 | 0     | 7     | 31    | 65    |
| Acidaminococcus sp. D21      | Not response      | D1 vs. R1       | Red   | Red   | Red   | Red   |
|                              | Complete response | D1 vs. R3       | White | Red   | Red   | White |
|                              | Partial response  | D1 vs. R5       | White | Red   | White | Red   |
|                              | Partial response  | D1 vs. R7       | White | Red   | Red   | Red   |
|                              | Not response      | D1 vs. R9       | White | Red   | White | White |
| Bifidobacterium adolescentis | Not response      | D1 vs. R1       | Red   | Blue  | Blue  | Red   |
|                              | Complete response | D1 vs. R3       | White | Blue  | Blue  | Blue  |
|                              | Partial response  | D1 vs. R5       | White | Blue  | Blue  | Blue  |
|                              | Partial response  | D1 vs. R7       | White | Blue  | Blue  | Blue  |
| Collinsella aerofaciens      | Not response      | D1 vs. R1       | Red   | Blue  | Blue  | Blue  |
|                              | Complete response | D1 vs. R3       | Red   | Blue  | Blue  | Blue  |
|                              | Partial response  | D1 vs. R5       | Red   | Blue  | Blue  | Blue  |
|                              | Partial response  | D1 vs. R7       | Red   | Blue  | Red   | Red   |
|                              | Not response      | D1 vs. R9       | Red   | Blue  | Blue  | Blue  |
|                              | Not response      | D2 vs. R2       | Red   | Red   | Red   | Red   |
|                              | Not response      | D2 vs. R4       | Red   | Red   | Red   | Red   |
|                              | Not response      | D2 vs. R6       | Red   | Red   | Red   | Red   |
|                              | Not response      | D2 vs. R8       | Red   | White | Red   | Red   |
|                              | Not response      | D2 vs. R10      | Red   | Red   | Red   | Red   |
| Coprococcus eutactus         | Not response      | D2 vs. R2       | Red   | Blue  | Blue  | Blue  |
|                              | Not response      | D2 vs. R4       | Red   | Blue  | Blue  | Blue  |
|                              | Not response      | D2 vs. R6       | Red   | Blue  | Blue  | Blue  |
|                              | Not response      | D2 vs. R8       | Red   | Blue  | Blue  | Blue  |
|                              | Not response      | D2 vs. R10      | Red   | Blue  | Blue  | Blue  |
| Eubacterium eligens          | Not response      | D1 vs. R1       | Red   | Red   | Red   | Red   |
|                              | Complete response | D1 vs. R3       | White | White | White | Red   |
|                              | Partial response  | D1 vs. R7       | White | White | White | Red   |
|                              | Not response      | D1 vs. R9       | Red   | Blue  | Red   | Red   |
|                              | Not response      | D2 vs. R4       | White | Blue  | White | White |
|                              | Not response      | D2 vs. R6       | White | Red   | Red   | Red   |
|                              | Not response      | D2 vs. R8       | White | Blue  | White | White |
| Eubacterium rectale          | Not response      | D1 vs. R1       | Red   | Red   | Blue  | Blue  |
|                              | Complete response | D1 vs. R3       | White | White | White | Blue  |
|                              | Partial response  | D1 vs. R5       | White | Blue  | Blue  | Blue  |
|                              | Partial response  | D1 vs. R7       | White | Blue  | Blue  | Red   |
|                              | Not response      | D1 vs. R9       | White | Blue  | Blue  | Red   |
|                              | Not response      | D2 vs. R2       | White | Blue  | Red   | Red   |
|                              | Not response      | D2 vs. R4       | White | Red   | Red   | Red   |
|                              | Not response      | D2 vs. R6       | White | Red   | Red   | Blue  |
|                              | Not response      | D2 vs. R8       | White | White | Red   | Red   |
|                              | Not response      | D2 vs. R10      | White | Red   | Blue  | Red   |

| Species                         | Response status                  | Donor-Recipient | Days      |       |       |       |     |
|---------------------------------|----------------------------------|-----------------|-----------|-------|-------|-------|-----|
|                                 |                                  |                 | 0         | 7     | 31    | 65    |     |
| Eubacterium siraeum             | Not response                     | D2 vs. R4       | Red       | White | Red   | White |     |
|                                 | Not response                     | D2 vs. R8       | White     | White | White | White |     |
| Faecalibacterium prausnitzii A2 | Not response                     | D2 vs. R2       | Red       | Red   | Blue  | Blue  |     |
|                                 | Not response                     | D2 vs. R4       | Red       | Red   | Blue  | Blue  |     |
|                                 | Not response                     | D2 vs. R6       | Red       | Red   | Red   | Red   |     |
|                                 | Not response                     | D2 vs. R8       | Red       | Red   | Red   | Red   |     |
| Faecalibacterium prausnitzii L2 | Not response                     | D1 vs. R1       | Red       | Red   | Red   | Red   |     |
|                                 | Complete response                | D1 vs. R3       | Red       | Red   | Red   | Red   |     |
|                                 | Partial response                 | D1 vs. R5       | Red       | Blue  | Blue  | Blue  |     |
|                                 | Partial response                 | D1 vs. R7       | Red       | Blue  | Blue  | Blue  |     |
| Faecalibacterium prausnitzii L2 | Not response                     | D1 vs. R9       | Red       | Blue  | Blue  | Red   |     |
|                                 | Not response                     | D2 vs. R2       | Red       | Red   | Red   | Red   |     |
|                                 | Not response                     | D2 vs. R4       | Red       | White | Red   | Red   |     |
|                                 | Not response                     | D2 vs. R6       | Red       | Red   | Red   | Red   |     |
|                                 | Not response                     | D2 vs. R8       | Red       | White | Red   | Red   |     |
|                                 | Not response                     | D2 vs. R10      | Red       | Red   | Red   | Red   |     |
|                                 | Faecalibacterium prausnitzii SL3 | Not response    | D2 vs. R2 | Red   | Red   | Red   | Red |
|                                 |                                  | Not response    | D2 vs. R4 | Red   | White | Red   | Red |
| Not response                    |                                  | D2 vs. R6       | Red       | Red   | Red   | Red   |     |
| Not response                    |                                  | D2 vs. R8       | Red       | Red   | Red   | Red   |     |
| Prevotella copri                | Not response                     | D2 vs. R2       | Red       | White | White | Blue  |     |
|                                 | Not response                     | D2 vs. R6       | Red       | Red   | Red   | White |     |
|                                 | Not response                     | D2 vs. R8       | Red       | Red   | Red   | Red   |     |
|                                 | Not response                     | D2 vs. R10      | White     | Red   | Red   | Red   |     |
| Roseburia intestinalis          | Not response                     | D1 vs. R1       | Red       | White | Blue  | White |     |
|                                 | Partial response                 | D1 vs. R5       | Red       | White | Red   | Red   |     |
|                                 | Partial response                 | D1 vs. R7       | Red       | Red   | Blue  | Blue  |     |
|                                 | Not response                     | D1 vs. R9       | Red       | Blue  | White | White |     |
|                                 | Not response                     | D2 vs. R2       | Red       | Blue  | Blue  | Blue  |     |
|                                 | Not response                     | D2 vs. R4       | Red       | Red   | Red   | Red   |     |
|                                 | Not response                     | D2 vs. R6       | White     | White | Blue  | White |     |
|                                 | Not response                     | D2 vs. R10      | Red       | Blue  | White | Red   |     |

 Pre or Post FMT strain was related to the donor's strain  
 Pre or Post FMT strain was unrelated to the donor's strain
