# Supplementary material for: Incongruence between dominant commensal donor microbes in recipient feces post fecal transplant and response to anti-PD-1 immunotherapy
Source: PubMed Central journal article supplement (PMC8454007; doi:10.1186/s12866-021-02312-0), 2021-09-20
Supplement: 12866_2021_2312_MOESM2_ESM.pdf [file 12866_2021_2312_MOESM2_ESM.pdf]

Fig. S2

| <b>Bacteroides sp. 1-1-6</b> |                   | <b>Days</b> |    |    |    |    |    |    |    |    |    |    |    |    |     |
|------------------------------|-------------------|-------------|----|----|----|----|----|----|----|----|----|----|----|----|-----|
| Response status              | Donor : Recipient | -21         | 12 | 19 | 27 | 33 | 40 | 47 | 55 | 61 | 68 | 75 | 83 | 90 | 103 |
| Not response                 | 18-0031 : 19-0013 |             |    |    |    |    |    |    |    |    |    |    |    |    |     |

| <b>Bacteroides sp. 2-1-16</b> |                   | <b>Days</b> |    |    |    |    |    |    |    |    |    |    |    |    |     |
|-------------------------------|-------------------|-------------|----|----|----|----|----|----|----|----|----|----|----|----|-----|
| Response status               | Donor : Recipient | -21         | 12 | 19 | 27 | 33 | 40 | 47 | 55 | 61 | 68 | 75 | 83 | 90 | 103 |
| Not response                  | 18-0031 : 19-0013 |             |    |    |    |    |    |    |    |    |    |    |    |    |     |

| <b>Bacteroides stercoris</b> |                   | <b>Days</b> |   |    |    |    |    |    |    |    |    |    |    |    |    |     |     |     |     |     |     |     |     |     |     |     |     |     |     |  |
|------------------------------|-------------------|-------------|---|----|----|----|----|----|----|----|----|----|----|----|----|-----|-----|-----|-----|-----|-----|-----|-----|-----|-----|-----|-----|-----|-----|--|
| Response status              | Donor : Recipient | -7          | 8 | 16 | 21 | 29 | 42 | 50 | 57 | 64 | 71 | 78 | 85 | 92 | 99 | 106 | 114 | 120 | 127 | 134 | 141 | 148 | 156 | 162 | 169 | 176 | 183 | 190 | 211 |  |
| Response                     | 18-0006 : 19-0002 |             |   |    |    |    |    |    |    |    |    |    |    |    |    |     |     |     |     |     |     |     |     |     |     |     |     |     |     |  |

| <b>Bacteroides cellulosilyticus</b> |                   | <b>Days</b> |    |    |    |    |    |    |    |    |    |    |    |    |     |
|-------------------------------------|-------------------|-------------|----|----|----|----|----|----|----|----|----|----|----|----|-----|
| Response status                     | Donor : Recipient | -21         | 12 | 19 | 27 | 33 | 40 | 47 | 55 | 61 | 68 | 75 | 83 | 90 | 103 |
| Not response                        | 18-0031 : 19-0013 |             |    |    |    |    |    |    |    |    |    |    |    |    |     |

Pre or Post FMT strain was related to the donor's strain  
 Pre or Post FMT strain was unrelated to the donor's strain
