# Supplementary material for: Incongruence between dominant commensal donor microbes in recipient feces post fecal transplant and response to anti-PD-1 immunotherapy
Source: PubMed Central journal article supplement (PMC8454007; doi:10.1186/s12866-021-02312-0), 2021-09-20
Supplement: 12866_2021_2312_MOESM3_ESM.pdf [file 12866_2021_2312_MOESM3_ESM.pdf]

Fig. S3

| <b>Bacteroides sp. 2-1-16</b> |                   | <b>Days</b> |    |   |    |    |    |    |    |    |    |    |    |    |    |    |    |    |     |     |  |
|-------------------------------|-------------------|-------------|----|---|----|----|----|----|----|----|----|----|----|----|----|----|----|----|-----|-----|--|
| Response status               | Donor : Recipient | -22         | -9 | 7 | 13 | 14 | 20 | 22 | 28 | 34 | 41 | 48 | 56 | 62 | 69 | 77 | 83 | 92 | 113 | 118 |  |
| Response                      | 18-0014 : 19-0024 |             |    |   |    |    |    |    |    |    |    |    |    |    |    |    |    |    |     |     |  |
| Response                      | 18-0014 : 18-0032 |             |    |   |    |    |    |    |    |    |    |    |    |    |    |    |    |    |     |     |  |

| <b>Bacteroides sp. 1-1-6</b> |                   | <b>Days</b> |     |    |   |    |    |    |    |    |    |    |    |    |    |    |    |    |    |    |    |    |    |    |    |     |     |     |
|------------------------------|-------------------|-------------|-----|----|---|----|----|----|----|----|----|----|----|----|----|----|----|----|----|----|----|----|----|----|----|-----|-----|-----|
| Response status              | Donor : Recipient | -28         | -22 | -9 | 7 | 13 | 14 | 20 | 21 | 22 | 28 | 29 | 34 | 35 | 41 | 45 | 48 | 56 | 57 | 62 | 67 | 69 | 77 | 83 | 92 | 113 | 118 | 118 |
| Response                     | 18-0014 : 19-0024 |             |     |    |   |    |    |    |    |    |    |    |    |    |    |    |    |    |    |    |    |    |    |    |    |     |     |     |
| Response                     | 18-0014 : 18-0032 |             |     |    |   |    |    |    |    |    |    |    |    |    |    |    |    |    |    |    |    |    |    |    |    |     |     |     |
| Not response                 | 18-0014 : 19-0007 |             |     |    |   |    |    |    |    |    |    |    |    |    |    |    |    |    |    |    |    |    |    |    |    |     |     |     |

 Pre or Post FMT strain was related to the donor's strain  
 Pre or Post FMT strain was unrelated to the donor's strain  
 A sample is not available
