# Supplementary material for: Incongruence between dominant commensal donor microbes in recipient feces post fecal transplant and response to anti-PD-1 immunotherapy
Source: PubMed Central journal article supplement (PMC8454007; doi:10.1186/s12866-021-02312-0), 2021-09-20
Supplement: 12866_2021_2312_MOESM5_ESM.pdf [file 12866_2021_2312_MOESM5_ESM.pdf]

Fig. S5

(A)

| Cecum vs. Transverse colon (IgG set)    | 287C | 312C | 296C | 298C | 290B | 302C |
|-----------------------------------------|------|------|------|------|------|------|
| Akkermansia muciniphila (CO: 99.8)      |      | ■    |      |      |      |      |
| Alistipes onderdonkii (CO: 97.4)        | ■    |      |      |      |      |      |
| Bacteroides massiliensis (CO: 97.7)     |      | ■    | ■    |      |      |      |
| Bacteroides sp. 1-1-6 (CO: 97.4)        |      | ■    | ■    |      |      |      |
| Bacteroides sp. 2-1-16 (CO: 98.1)       |      | ■    |      |      |      |      |
| Bacteroides vulgatus (CO: 95.1)         | ■    | ■    |      |      |      |      |
| Barnesiella intestinihominis (CO: 99.3) |      | ■    |      |      |      |      |
| Bifidobacterium adolescentis (CO:69.4)  |      |      | ■    | ■    |      |      |
| Collinsella aerofaciens (CO: 79.2)      |      |      | ■    | ■    |      |      |
| Parabacteroides sp. D13 (CO: 99)        | ■    |      | ■    |      |      |      |
| Parabacteroides_merdae (CO: 98.1)       |      |      | ■    |      |      |      |
| Ruminococcus torques ATCC (CO: 96.6)    |      |      | ■    |      |      |      |

(B)

| Cecum vs. Sigmoid colon (IgG set)           | 287C | 312C | 296C | 298C | 290B | 302C |
|---------------------------------------------|------|------|------|------|------|------|
| Akkermansia muciniphila (CO: 99.8)          |      | ■    |      |      |      |      |
| Bacteroides plebeius (CO: 67.2)             |      |      |      | ■    |      |      |
| Bacteroides uniformis (CO: 97.8)            |      |      |      | ■    |      |      |
| Bacteroides vulgatus (CO: 95.1)             | ■    |      |      | ■    |      |      |
| Bifidobacterium adolescentis (CO:69.4)      |      |      |      | ■    |      | ■    |
| Collinsella aerofaciens (CO: 79.2)          |      |      |      | ■    |      |      |
| Faecalibacterium prausnitzii A2 (CO: 90)    |      |      |      | ■    |      | ■    |
| Faecalibacterium prausnitzii SL3 (CO: 81.5) |      |      |      |      |      | ■    |
| Parabacteroides sp. D13 (CO: 99)            | ■    |      |      | ■    |      |      |
| Parabacteroides_merdae (CO: 98.1)           |      |      | ■    | ■    |      | ■    |
| Prevotella copri (CO: 91.3)                 |      |      |      |      |      | ■    |

(C)

| Transverse colon vs. Sigmoid colon (IgG set) | 287C | 312C | 296C | 298C | 290B | 302C |
|----------------------------------------------|------|------|------|------|------|------|
| Akkermansia muciniphila (CO: 99.8)           |      | ■    |      |      |      |      |
| Bacteroides vulgatus (CO: 95.1)              | ■    |      |      |      |      |      |
| Bifidobacterium adolescentis (CO:69.4)       |      |      |      | ■    |      |      |
| Collinsella aerofaciens (CO: 79.2)           |      |      |      | ■    | ■    |      |
| Parabacteroides sp. D13 (CO: 99)             | ■    |      |      |      |      |      |
| Parabacteroides_merdae (CO: 98.1)            |      |      | ■    |      |      |      |

■ Related strain found between two compared samples  
 ■ Unrelated strain found between two compared samples
