# Supplementary material for: Incongruence between dominant commensal donor microbes in recipient feces post fecal transplant and response to anti-PD-1 immunotherapy
Source: BMC Microbiol. 2021 Sep 20;21:251. doi: 10.1186/s12866-021-02312-0 (PMC8454007; doi:10.1186/s12866-021-02312-0)
Supplement: Supplementary file 4 — Additional file 4: Figure S4. Other species’ summarized WSS scores from the longitudinal analysis. WSS analysis of the sample pairs used for this figure is provided in Fig. 4. (A) donor of 18 − 0002 was used to recipients (18–0018) for FMT; and (B) donor of 18 − 0005 was used to the recipient (18 − 0007). Summarized WSS scores for all pairs used in this analysis are provided in Table S3. All samples that used for this analysis are listed in Table S1. The summarized WSS scores from the species that were not included in Fig. 4 were grouped into different color boxes (see the figure key). [file 12866_2021_2312_MOESM4_ESM.pdf]

Fig. S4

(A)

| Bacteroides stercoris |                   | Days |    |    |    |    |    |    |    |    |    |    |    |     |     |     |     |     |     |     |     |     |     |     |     |     |     |     |     |     |     |     |     |     |     |  |
|-----------------------|-------------------|------|----|----|----|----|----|----|----|----|----|----|----|-----|-----|-----|-----|-----|-----|-----|-----|-----|-----|-----|-----|-----|-----|-----|-----|-----|-----|-----|-----|-----|-----|--|
| Response status       | Donor : Recipient | -23  | 21 | 29 | 36 | 42 | 47 | 56 | 63 | 69 | 75 | 90 | 96 | 112 | 133 | 342 | 383 | 390 | 411 | 419 | 424 | 432 | 440 | 447 | 452 | 461 | 466 | 473 | 482 | 490 | 496 | 503 | 514 | 528 | 535 |  |
| Response              | 18-0002 : 18-0018 |      |    |    |    |    |    |    |    |    |    |    |    |     |     |     |     |     |     |     |     |     |     |     |     |     |     |     |     |     |     |     |     |     |     |  |

| Bacteroides massiliensis |                   | Days |    |    |    |    |    |    |    |    |    |    |    |     |     |     |     |     |     |     |     |     |     |     |     |     |     |     |     |     |     |     |     |     |     |  |
|--------------------------|-------------------|------|----|----|----|----|----|----|----|----|----|----|----|-----|-----|-----|-----|-----|-----|-----|-----|-----|-----|-----|-----|-----|-----|-----|-----|-----|-----|-----|-----|-----|-----|--|
| Response status          | Donor : Recipient | -23  | 21 | 29 | 36 | 42 | 47 | 56 | 63 | 69 | 75 | 90 | 96 | 112 | 133 | 342 | 383 | 390 | 411 | 419 | 424 | 432 | 440 | 447 | 452 | 461 | 466 | 473 | 482 | 490 | 496 | 503 | 514 | 528 | 535 |  |
| Response                 | 18-0002 : 18-0018 |      |    |    |    |    |    |    |    |    |    |    |    |     |     |     |     |     |     |     |     |     |     |     |     |     |     |     |     |     |     |     |     |     |     |  |

| Bacteroides sp. 1-1-6 |                   | Days |    |    |    |    |    |    |    |    |    |    |    |     |     |     |     |     |     |     |     |     |     |     |     |     |     |     |     |     |     |     |     |     |     |  |
|-----------------------|-------------------|------|----|----|----|----|----|----|----|----|----|----|----|-----|-----|-----|-----|-----|-----|-----|-----|-----|-----|-----|-----|-----|-----|-----|-----|-----|-----|-----|-----|-----|-----|--|
| Response status       | Donor : Recipient | -23  | 21 | 29 | 36 | 42 | 47 | 56 | 63 | 69 | 75 | 90 | 96 | 112 | 133 | 342 | 383 | 390 | 411 | 419 | 424 | 432 | 440 | 447 | 452 | 461 | 466 | 473 | 482 | 490 | 496 | 503 | 514 | 528 | 535 |  |
| Response              | 18-0002 : 18-0018 |      |    |    |    |    |    |    |    |    |    |    |    |     |     |     |     |     |     |     |     |     |     |     |     |     |     |     |     |     |     |     |     |     |     |  |

(B)

| Bacteroides sp. 1-1-6 |                   | Days |   |   |    |    |    |    |    |    |     |     |     |     |     |     |
|-----------------------|-------------------|------|---|---|----|----|----|----|----|----|-----|-----|-----|-----|-----|-----|
| Response status       | Donor : Recipient | -7   | 1 | 7 | 20 | 21 | 41 | 53 | 73 | 85 | 101 | 174 | 267 | 357 | 471 | 514 |
| Response              | 18-0005 : 18-0007 |      |   |   |    |    |    |    |    |    |     |     |     |     |     |     |

| Bacteroides cellulosilyticus |                   | Days |   |   |    |    |    |    |    |    |     |     |     |     |     |     |
|------------------------------|-------------------|------|---|---|----|----|----|----|----|----|-----|-----|-----|-----|-----|-----|
| Response status              | Donor : Recipient | -7   | 1 | 7 | 20 | 21 | 41 | 53 | 73 | 85 | 101 | 174 | 267 | 357 | 471 | 514 |
| Response                     | 18-0005 : 18-0007 |      |   |   |    |    |    |    |    |    |     |     |     |     |     |     |

| Bacteroides sp. 2-1-16 |                   | Days |   |   |    |    |    |    |    |    |     |     |     |     |     |     |
|------------------------|-------------------|------|---|---|----|----|----|----|----|----|-----|-----|-----|-----|-----|-----|
| Response status        | Donor : Recipient | -7   | 1 | 7 | 20 | 21 | 41 | 53 | 73 | 85 | 101 | 174 | 267 | 357 | 471 | 514 |
| Response               | 18-0005 : 18-0007 |      |   |   |    |    |    |    |    |    |     |     |     |     |     |     |

Pre or Post FMT strain was related to the donor’s strain

Pre or Post FMT strain was unrelated to the donor’s strain

Post FMT strain was related to the recipient’s pre FMT strain
